# Supplementary material for: Electrochemical energy storage in a β-Na0.33V2O5 nanobelt network and its application for supercapacitors
Source: Royal Society of Chemistry journal article supplement (doi:10.1039/c0jm00652a), 2010-01-01
Supplement: c0jm00652a.pdf [file c0jm00652a.pdf]

### Supporting information - Table S1

**Table S1** Comparison of the capacitive performances of crystalline V<sub>2</sub>O<sub>5</sub>-based materials

|                                                                     | <u>Specific Capacitance (F g<sup>-1</sup>)</u> | <u>Reference</u> |
|---------------------------------------------------------------------|------------------------------------------------|------------------|
| $\beta$ -Na <sub>0.33</sub> V <sub>2</sub> O <sub>5</sub> nanobelts | 320                                            | This work        |
| V <sub>2</sub> O <sub>5</sub> nanowire / CNT composite              | 313                                            | 16               |
| V <sub>2</sub> O <sub>5</sub> powder                                | 214                                            | 17               |
| V <sub>2</sub> O <sub>5</sub> .0.6H <sub>2</sub> O nanoribbons      | 181                                            | 18               |
| V <sub>2</sub> O <sub>5</sub> nanowires                             | 146                                            | 16               |
